# Supplementary material for: Recyclable and Mendable Cellulose-Reinforced Composites Crosslinked with Diels–Alder Adducts
Source: MDPI journal article supplement (doi:10.3390/polym11010117), 2019-01-11
Supplement: s1 [file s1]

## Supplementary Materials

### Recyclable and mendable cellulose-reinforced composites crosslinked with Diels-Alder adducts

KeumHwan Park <sup>1</sup>, Cheolmin Shin <sup>2</sup>, Ye-Seul Song <sup>1</sup>, Hee-Jin Lee <sup>1</sup>, Chiho Shin <sup>2</sup> and Youngmin Kim<sup>1,\*</sup>

<sup>1</sup> Display Materials & Components Research Center, Korea Electronics Technology Institute, 25 Saenari-ro, Bundang-gu, Seongnam-si, Gyeonggi-do 13509, Korea

<sup>2</sup> Kwangsung Corporation Co., Ltd. 212-14, Neungan-gil, Songsan-myeon, Dangjin-Si, Chungcheongnam-do 31711, Korea

\* Correspondence: ymkim109f@gmail.com; Tel.: +82 31 789 7432

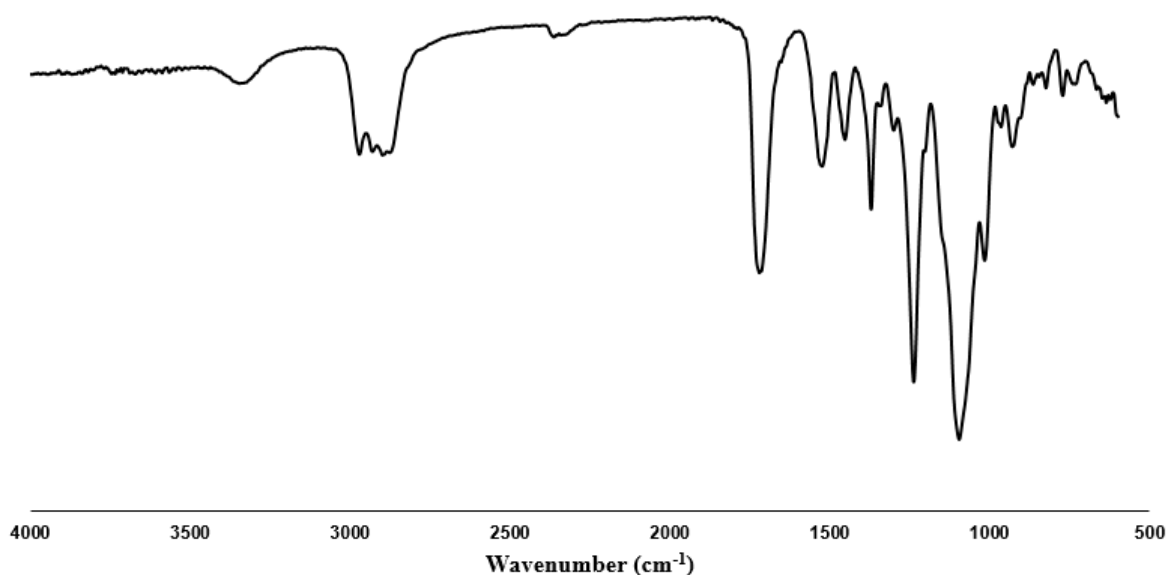

Figure S1. FTIR spectrum of F-PU.

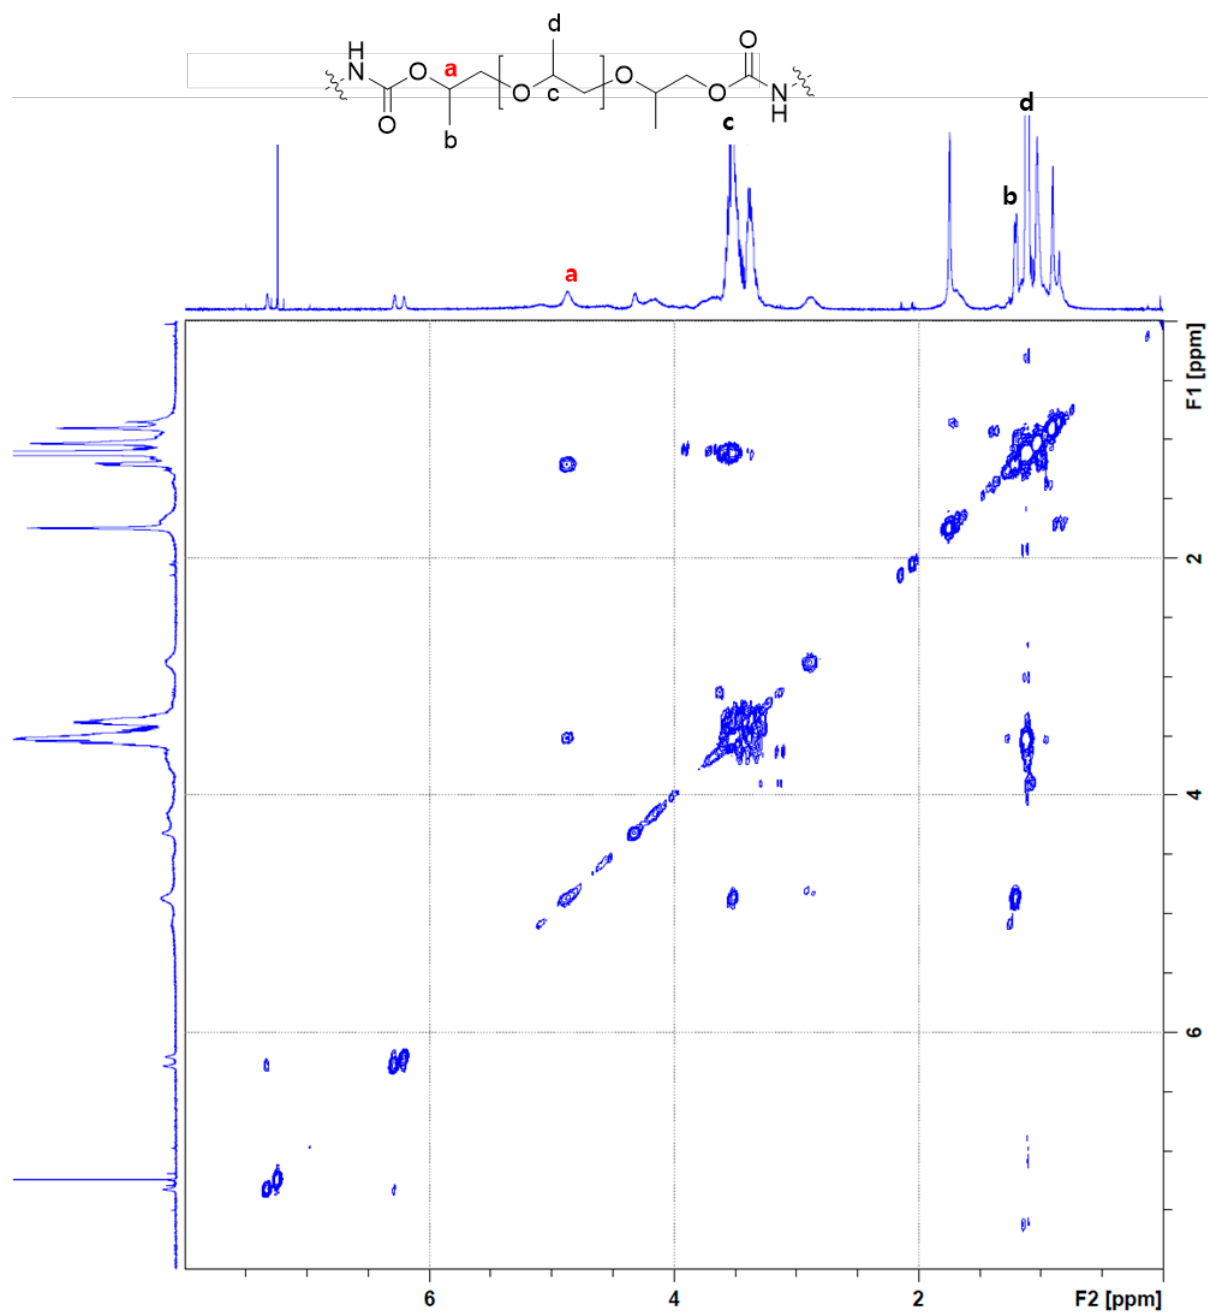

**Figure S2.** 2D COSY NMR of polymer F-PU. There was a correlation between the proton (a) next to the urethane bond and the protons (b) on the methyl group.

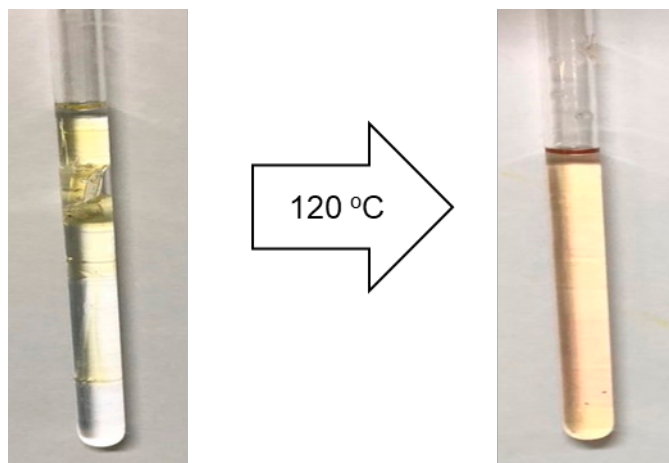

**Figure S3.** DA-PU in the NMR tube (left) before and (right) after being heated at 120 °C for 20 minutes.

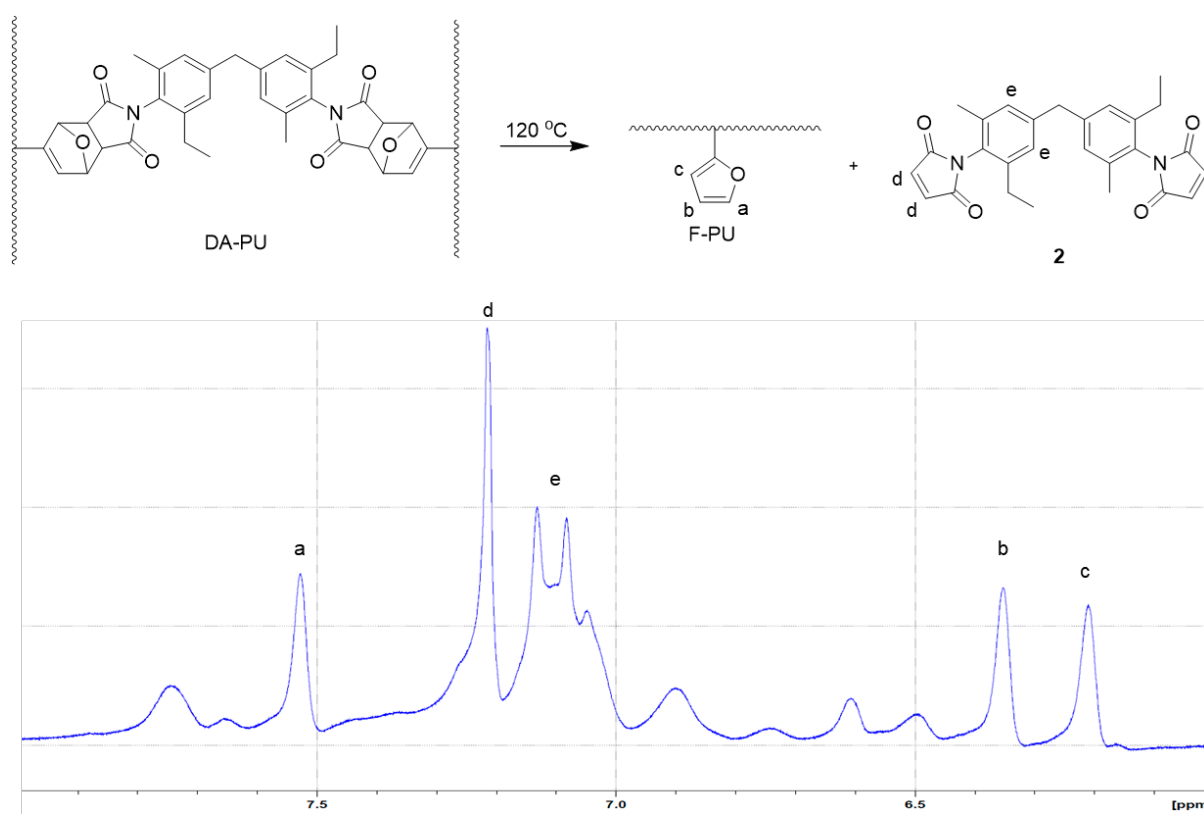

**Figure S4.** <sup>1</sup>H-NMR spectrum of DA-PU in DMSO-*d*<sub>6</sub> ranging from 6.0 ppm to 8.0 ppm after heat treatment.

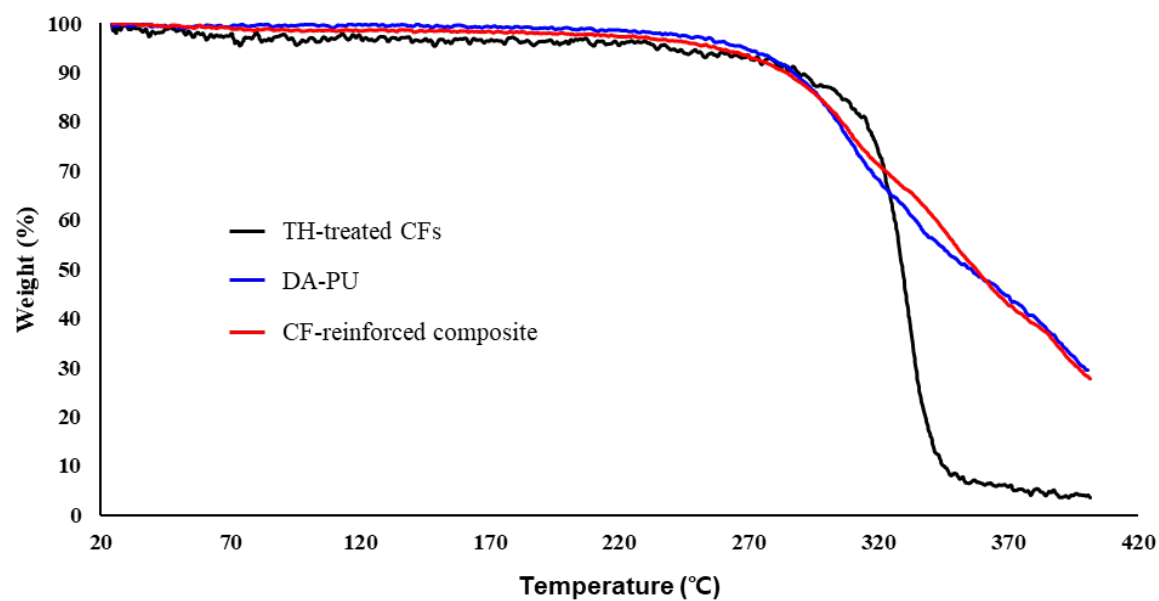

**Figure S5.** TGA graphs over temperature for (a) TH-treated CFs, (b) DA-PU and (c) the CF-reinforced composite.

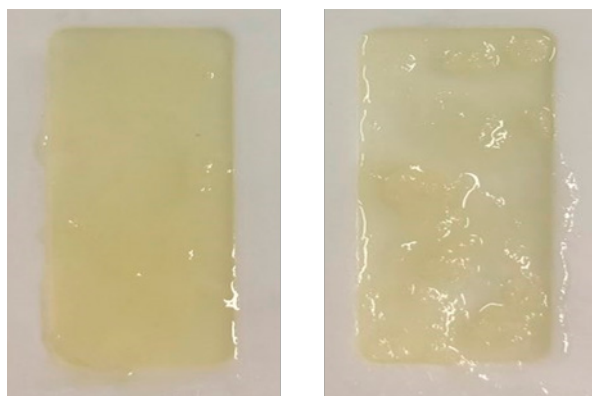

**Figure S6.** CF-reinforced polymer composites with a CF content of 5 wt%. The composites were prepared using (left) the TH-treated CFs and (right) the pristine CFs.
